# Supplementary material
Source: PubMed Central journal article supplement (PMC153069)
Supplement: pnas_0630387100_12.pdf [file pnas_0630387100_12.pdf]

**Table 1. Comparison of expression levels produced in microarray and real-time (RT)-PCR experiments for a set of seven DEIRA genes**

| Gene ID | Annotation                         | Method     | Time (h) post irradiation<br>Responds to radiation (folds) |       |       |       |       |       |       |      |      |
|---------|------------------------------------|------------|------------------------------------------------------------|-------|-------|-------|-------|-------|-------|------|------|
|         |                                    |            | 0                                                          | 0.5   | 1.5   | 3     | 5     | 9     | 12    | 16   | 24   |
| DR0007  | Unknown                            | Microarray | 1.02                                                       | 3.93  | 2.99  | 1.39  | 1.73  | 1.53  | 1.88  | 1.17 | 1.78 |
|         |                                    | RT-PCR     | 0.21                                                       | 0.37  | 1.77  | 0.69  | 0.95  | 1.31  | 1.38  | 1.89 | 1.49 |
| DR2340  | RecA                               | Microarray | 1.13                                                       | 6.62  | 7.98  | 5.02  | 5.27  | 4.06  | 3.70  | 2.15 | 1.44 |
|         |                                    | RT-PCR     | 0.65                                                       | 1.67  | 9.96  | 11.23 | 2.06  | 0.63  | 0.91  | 0.30 | 0.10 |
| DRB0100 | DNA ligase                         | Microarray | 1.63                                                       | 1.47  | 9.24  | 14.43 | 9.42  | 6.24  | 4.42  | 4.16 | 2.28 |
|         |                                    | RT-PCR     | 2.38                                                       | 7.98  | 17.82 | 12.18 | 8.64  | 4.14  | 3.97  | 3.93 | 1.68 |
| DR2339  | LigT-RNA ligase                    | Microarray | 1.68                                                       | 6.00  | 14.06 | 13.44 | 13.85 | 9.50  | 5.01  | 1.22 | 1.03 |
|         |                                    | RT-PCR     | 3.51                                                       | 6.52  | 14.24 | 2.88  | 1.51  | 2.48  | 2.94  | 0.52 | 1.42 |
| DR0422  | SAM-dependent<br>methyltransferase | Microarray | 1.28                                                       | 13.99 | 18.85 | 10.95 | 8.18  | 4.39  | 2.69  | 1.79 | 1.14 |
|         |                                    | RT-PCR     | 3.00                                                       | 16.86 | 18.32 | 5.27  | 4.92  | 4.48  | 1.77  | 3.28 | 3.36 |
| DR0053  | DinB family                        | Microarray | 1.67                                                       | 4.49  | 10.16 | 10.25 | 6.10  | 3.67  | 2.30  | 1.35 | 1.30 |
|         |                                    | RT-PCR     | 0.68                                                       | 3.61  | 10.70 | 11.31 | 9.83  | 2.42  | 3.63  | 3.13 | 0.15 |
| DR0207  | ComA                               | Microarray | 2.14                                                       | 2.83  | 10.89 | 15.47 | 12.40 | 3.86  | 3.87  | 1.87 | 1.35 |
|         |                                    | RT-PCR     | 1.37                                                       | 5.41  | 18.68 | 19.96 | 33.22 | 21.12 | 16.95 | 3.30 | 4.34 |
