# Supplementary material
Source: PubMed Central journal article supplement (PMC153069)
Supplement: pnas_0630387100_13.pdf [file pnas_0630387100_13.pdf]

**Table 2. Sequences of the primers used in the real-time quantitative PCR**

| DR #    | Gene product                       | Primer sequence                                | PCR product size, bp |
|---------|------------------------------------|------------------------------------------------|----------------------|
| DR0007  | Unknown                            | CAGTGGTGCTGATCGTGAGT<br>ATAGACGAGTTCGCGCAGTT   | 116                  |
| DR2340  | RecA protein                       | CCCCTTCAAGGAAGTCGAAC<br>CGCCGTAGGAGTAGAAGCTG   | 125                  |
| DRB0100 | DNA ligase                         | GCGAGTCAAATACCCCTTCCA<br>GGTAGAGGCTGGTGTTTTTCG | 146                  |
| DR2339  | 2'-5' RNA ligase                   | AACACCAACCGTCCACCTAC<br>AGGTACGAGAGGGTGACGTG   | 145                  |
| DR0422  | SAM-dependent<br>methyltransferase | GCTTCGACCTGCTGTACTCC<br>GTCGTGATTTGCTGGAACCT   | 128                  |
| DR0053  | DinB/YfiT family                   | CCGCAGGTAAGCACTGAGAT<br>TGGACCTCGTTGTCAATCAA   | 101                  |
| DR0207  | ComA protein                       | CCCGGTAAACGTCAACACTG<br>GCCTTTGACCTTTTTGACCA   | 133                  |
