# Supplementary material
Source: PubMed Central journal article supplement (PMC153069)
Supplement: pnas_0630387100_14.pdf [file pnas_0630387100_14.pdf]

**Table 3. Selected genes and operons of DEIRA with a *recA*-like expression pattern**

| Gene ID* | Function group <sup>†</sup> | Protein description and comments                                               | Relative basal level | Maximum induction level, fold | STD   | CV    | Maximum induction time, h |
|----------|-----------------------------|--------------------------------------------------------------------------------|----------------------|-------------------------------|-------|-------|---------------------------|
| DR0003   | -                           | Uncharacterized protein                                                        | 1.32                 | 14.03                         | 5.53  | 39.39 | 1.5                       |
| DR0046   | -                           | Leucine-rich repeat protein                                                    | 0.18                 | 2.14                          | 0.35  | 16.21 | 3                         |
| DR0047   | -                           | Uncharacterized protein                                                        | 0.11                 | 2.48                          | 1.40  | 56.42 | 3                         |
| DR0048   | S                           | Uncharacterized membrane protein, YcaP ortholog                                | 0.33                 | 3.90                          | 0.55  | 14.01 | 3                         |
| DR0050   | L                           | DinB/YfiT family protein                                                       | 0.53                 | 3.84                          | 0.93  | 24.23 | 3                         |
| DR0051   | S                           | Small cysteine-rich protein of the HesB family                                 | 0.70                 | 5.93                          | 3.32  | 55.97 | 3                         |
| DR0052   | -                           | Uncharacterized conserved protein                                              | 0.34                 | 6.50                          | 2.15  | 33.14 | 1.5                       |
| DR0053   | L                           | DinB/YfiT family protein                                                       | 0.44                 | 10.25                         | 2.36  | 23.00 | 3                         |
| DR0070   | ST?                         | Uncharacterized protein                                                        | 0.08                 | 3.89                          | 1.72  | 44.18 | 9                         |
| DR0103   | R                           | Predicted metal-binding protein                                                | 0.57                 | 6.46                          | 4.02  | 62.22 | 1.5                       |
| DR0140   | -                           | Uncharacterized protein                                                        | 0.97                 | 6.44                          | 2.87  | 44.60 | 1.5                       |
| DR0160   | -                           | Conserved membrane protein                                                     | 0.42                 | 3.90                          | 0.86  | 22.09 | 1.5                       |
| DR0161   | S                           | AmsJ/WcaK related protein, possibly involved in exopolysaccharide biosynthesis | 0.97                 | 8.12                          | 4.07  | 50.14 | 1.5                       |
| DR0203   | R                           | Uncharacterized membrane protein                                               | 0.28                 | 3.82                          | 0.86  | 22.43 | 1.5                       |
| DR0204   | -                           | Uncharacterized membrane protein                                               | 0.51                 | 6.01                          | 1.35  | 22.52 | 3                         |
| DR0205   | Q                           | ABC transporter ATPase                                                         | 0.49                 | 4.10                          | 2.45  | 59.75 | 3                         |
| DR0206   | -                           | Uncharacterized protein                                                        | 0.19                 | 5.45                          | 2.65  | 48.56 | 3                         |
| DR0207   | L                           | ComEA related protein, secreted                                                | 0.26                 | 15.47                         | 10.31 | 66.66 | 3                         |
| DR0324   | E                           | Predicted glutamate formiminotransferase                                       | 0.31                 | 3.30                          | 1.47  | 44.50 | 0.5                       |
| DR0363   | E                           | ABC-type dipeptide transporter                                                 | 2.79                 | 4.09                          | 1.75  | 42.74 | 24                        |

| Gene ID* | Function group <sup>†</sup> | Protein description and comments                            | Relative basal level | Maximum induction level, fold | STD  | CV    | Maximum induction time, h |
|----------|-----------------------------|-------------------------------------------------------------|----------------------|-------------------------------|------|-------|---------------------------|
|          |                             | periplasmic binding protein, DppA                           |                      |                               |      |       |                           |
| DR0365   | E                           | ABC-type dipeptide transporter, permease ,DppC              | 2.11                 | 1.48                          | 0.84 | 56.88 | 5                         |
| DR0394   | ST                          | Predicted kinase antibiotic/homoserine kinase homolog       | 0.29                 | 7.51                          | 2.76 | 36.69 | 1.5                       |
| DR0395   | G                           | MDR-type permease                                           | 1.09                 | 4.40                          | 2.12 | 48.16 | 1.5                       |
| DR0396   | -                           | Uncharacterized protein                                     | 1.15                 | 5.57                          | 2.39 | 42.78 | 1.5                       |
| DR0421   | -                           | Uncharacterized protein                                     | 0.68                 | 4.94                          | 2.30 | 46.60 | 1.5                       |
| DR0422   | Q                           | Trans-aconitate methylase                                   | 0.68                 | 18.85                         | 7.46 | 39.59 | 1.5                       |
| DR0477   | E                           | Membrane permease, Dh1C homolog                             | 0.56                 | 4.63                          | 1.71 | 36.85 | 1.5                       |
| DR0478   | E                           | Aminopeptidase P                                            | 0.77                 | 2.86                          | 0.55 | 19.36 | 0.5                       |
| DR0479   | M                           | Penicillin-binding protein 1                                | 0.77                 | 7.07                          | 2.42 | 34.21 | 1.5                       |
| DR0599   | ST                          | Aminoglycoside N3'-acetyltransferase family                 | 1.31                 | 4.24                          | 1.41 | 33.31 | 1.5                       |
| DR0609   | R                           | Predicted kinase, adenylate kinase homolog                  | 0.47                 | 2.43                          | 1.14 | 46.95 | 3                         |
| DR0610   | -                           | Uncharacterized protein                                     | 0.25                 | 6.10                          | 4.51 | 73.93 | 3                         |
| DR0665   | -                           | Uncharacterized protein                                     | 0.54                 | 11.66                         | 5.74 | 49.24 | 3                         |
| DR0694   | C                           | Phage protein homolog                                       | 0.60                 | 5.57                          | 2.02 | 36.28 | 1.5                       |
| DR0812   | O                           | Extracellular alkaline serine protease                      | 0.59                 | 3.32                          | 1.24 | 37.52 | 3                         |
| DR0841   | L                           | DinB/YfiT family protein                                    | 0.48                 | 5.93                          | 1.47 | 24.84 | 1.5                       |
| DR0842   | ST                          | NimC-like (5-nitroimidazole antibiotics resistance) protein | 2.62                 | 1.89                          | 0.69 | 36.67 | 24                        |
| DR0911   | K                           | DNA-directed RNA polymerase beta' subunit                   | 1.62                 | 1.99                          | 1.37 | 68.70 | 0.5                       |
| DR0912   | K                           | DNA-directed RNA polymerase beta subunit                    | 0.54                 | 3.19                          | 0.80 | 24.90 | 0.5                       |
| DR1143   | -                           | Uncharacterized protein                                     | 0.49                 | 8.85                          | 4.26 | 48.13 | 1.5                       |
| DR1144   | -                           | Uncharacterized conserved protein                           | 1.10                 | 2.69                          | 1.31 | 48.82 | 1.5                       |

| Gene ID* | Function group <sup>†</sup> | Protein description and comments                                                                                                      | Relative basal level | Maximum induction level, fold | STD   | CV    | Maximum induction time, h |
|----------|-----------------------------|---------------------------------------------------------------------------------------------------------------------------------------|----------------------|-------------------------------|-------|-------|---------------------------|
| DR1356   | R                           | ABC transporter, ATPase subunit                                                                                                       | 0.40                 | 9.85                          | 5.98  | 60.68 | 3                         |
| DR1357   | R                           | ABC transporter, permease subunit                                                                                                     | 0.31                 | 6.79                          | 2.56  | 37.67 | 1.5                       |
| DR1358   | M                           | ABC transporter, periplasmic subunit                                                                                                  | 0.38                 | 22.73                         | 13.73 | 60.39 | 1.5                       |
| DR1359   | M                           | ABC transporter, periplasmic subunit                                                                                                  | 0.50                 | 24.83                         | 11.13 | 44.82 | 1.5                       |
| DR1398   | -                           | Uncharacterized protein                                                                                                               | 0.24                 | 4.17                          | 1.04  | 24.83 | 1.5                       |
| DR1548   | T                           | Bacillus ykwD ortholog, Divergent member of the secreted PRP1, plant pathogenesis related protein superfamily                         | 0.48                 | 5.62                          | 2.34  | 41.32 | 3                         |
| DR1556   | -                           | Membrane-associated sensor histidine kinase                                                                                           | 2.27                 | 3.61                          | 1.71  | 47.23 | 1.5                       |
| DR1557   | T                           | Uncharacterized protein                                                                                                               | 1.37                 | 5.06                          | 1.57  | 31.04 | 1.5                       |
| DR1558   | -                           | Receiver domain (flavodoxin, CheY family) of a two component system, contains a C- terminal helix-turn-helix (HTH) DNA-binding domain | 1.12                 | 5.64                          | 1.49  | 26.43 | 1.5                       |
| DR1559   | E                           | Uncharacterized protein                                                                                                               | 0.87                 | 4.39                          | 1.60  | 36.47 | 1.5                       |
| DR1639   | L                           | Uncharacterized protein                                                                                                               | 1.15                 | 4.41                          | 1.84  | 41.73 | 1.5                       |
| DR1641   | L                           | DinB/YfiT family protein                                                                                                              | 2.52                 | 1.88                          | 0.78  | 41.24 | 5                         |
| DR1642   | -                           | DinB/YfiT family protein                                                                                                              | 0.27                 | 3.71                          | 1.30  | 35.02 | 1.5                       |
| DR1643   | -                           | Uncharacterized protein                                                                                                               | 0.61                 | 4.06                          | 2.21  | 54.45 | 1.5                       |
| DR1644   | Q                           | Uncharacterized protein                                                                                                               | 0.77                 | 2.45                          | 0.56  | 22.82 | 1.5                       |
| DR1672   | -                           | SAM-dependent methyltransferase                                                                                                       | 0.41                 | 1.24                          | 0.73  | 59.15 | 12                        |
| DR1673   | -                           | Predicted dehydrogenase                                                                                                               | 1.05                 | 4.53                          | 1.29  | 28.54 | 1.5                       |
| DR1744   | L                           | Uncharacterized protein                                                                                                               | 1.47                 | 5.02                          | 1.64  | 32.69 | 1.5                       |
| DR1776   | -                           | Nudix/MutT family pyrophosphatase                                                                                                     | 0.84                 | 4.70                          | 2.83  | 60.18 | 1.5                       |
| DR1850   | L                           | Uncharacterized protein                                                                                                               | 0.62                 | 4.36                          | 1.13  | 26.00 | 1.5                       |
| DR1899   | -                           | DinB/YfiT family protein                                                                                                              | 0.35                 | 1.60                          | 0.65  | 40.30 | 1.5                       |

| Gene ID* | Function group <sup>†</sup> | Protein description and comments                                               | Relative basal level | Maximum induction level, fold | STD  | CV    | Maximum induction time, h |
|----------|-----------------------------|--------------------------------------------------------------------------------|----------------------|-------------------------------|------|-------|---------------------------|
| DR1900   | -                           | Uncharacterized protein                                                        | 0.51                 | 3.14                          | 1.04 | 33.14 | 1.5                       |
| DR1901   | -                           | Uncharacterized protein                                                        | 0.51                 | 10.74                         | 4.85 | 45.17 | 1.5                       |
| DR2097   | E                           | Uncharacterized protein                                                        | 0.14                 | 6.95                          | 2.08 | 29.93 | 1.5                       |
| DR2118   | E                           | ABC-type branched amino acid transporter                                       | 0.26                 | 3.04                          | 1.38 | 45.32 | 5                         |
| DR2122   | E                           | Branched amino acid periplasmic binding protein, LivBP                         | 0.20                 | 2.46                          | 0.29 | 11.94 | 3                         |
| DR2128   | ST                          | RNA polymerase alpha subunit                                                   | 2.26                 | 4.03                          | 2.80 | 69.48 | 1.5                       |
| DR2220   | ST                          | Tellurium resistance protein, TerB homolog                                     | 0.45                 | 3.13                          | 1.49 | 47.61 | 5                         |
| DR2221   | ST                          | Tellurium resistance/cAMP-binding family protein                               | 0.59                 | 5.24                          | 2.94 | 56.05 | 3                         |
| DR2223   | ST                          | Tellurium resistance/cAMP-binding family protein                               | 0.39                 | 3.63                          | 1.36 | 37.45 | 3                         |
| DR2225   | -                           | Tellurium resistance/cAMP-binding family protein                               | 0.58                 | 2.14                          | 0.41 | 19.30 | 3                         |
| DR2265   | -                           | Large membrane protein                                                         | 0.44                 | 5.45                          | 1.46 | 26.84 | 3                         |
| DR2337   | T                           | Uncharacterized protein                                                        | 0.11                 | 7.41                          | 5.71 | 77.05 | 1.5                       |
| DR2415   | T                           | Receiver domain, CheY family and HTH                                           | 0.16                 | 1.72                          | 1.26 | 73.28 | 5                         |
| DR2416   | -                           | Sensor histidine kinase                                                        | 0.84                 | 5.75                          | 1.33 | 23.09 | 1.5                       |
| DR2481   | K                           | Uncharacterized protein                                                        | 0.39                 | 4.66                          | 1.27 | 27.17 | 1.5                       |
| DR2482   | L                           | Predicted transcription regulator, HTH domain related to that of sigma factors | 0.36                 | 5.75                          | 2.92 | 50.84 | 1.5                       |
| DR2483   | R                           | McrA family nuclease                                                           | 0.80                 | 5.43                          | 1.22 | 22.49 | 1.5                       |
| DR2484   | L                           | WD40 repeat protein                                                            | 0.71                 | 5.12                          | 2.53 | 49.39 | 1.5                       |
| DR2566   | -                           | Homolog of HpaII repair protein, small, conserved bacterial protein            | 0.42                 | 4.10                          | 1.09 | 26.48 | 3                         |
| DR2573   | E                           | Uncharacterized protein                                                        | 0.22                 | 3.93                          | 2.57 | 65.55 | 0.5                       |
| DR2610   | R                           | Periplasmic binding protein, FliY                                              | 1.01                 | 4.13                          | 1.67 | 40.46 | 0.5                       |
| DRA0008  | T                           | Conserved membrane protein (possible transporter)                              | 0.26                 | 6.60                          | 2.00 | 30.26 | 3                         |

| Gene ID* | Function group <sup>†</sup> | Protein description and comments                                                    | Relative basal level | Maximum induction level, fold | STD  | CV    | Maximum induction time, h |
|----------|-----------------------------|-------------------------------------------------------------------------------------|----------------------|-------------------------------|------|-------|---------------------------|
| DRA0009  | T                           | Membrane-associated sensor histidine kinase                                         | 0.19                 | 3.03                          | 1.25 | 41.30 | 5                         |
| DRA0010  | P                           | CheY -like sensor regulator and HTH domain                                          | 0.28                 | 4.66                          | 2.12 | 45.44 | 5                         |
| DRA0013  | P                           | Sulfite reductase                                                                   | 0.65                 | 8.27                          | 1.84 | 22.31 | 24                        |
| DRA0014  | E                           | PAPS synthase (APS kinase domain), CysC                                             | 0.37                 | 4.33                          | 1.66 | 38.36 | 24                        |
| DRA0015  | P                           | PAPS reductase                                                                      | 0.54                 | 11.42                         | 5.73 | 50.18 | 24                        |
| DRA0016  | T                           | Sulfate adenylyltransferase                                                         | 0.42                 | 12.12                         | 5.83 | 48.07 | 24                        |
| DRA0049  | T                           | Response regulator CheY family, flavodoxin                                          | 0.12                 | 3.16                          | 1.70 | 53.75 | 9                         |
| DRA0050  | -                           | Phytochrome-like histidine kinase and GAF domain                                    | 0.30                 | 2.18                          | 1.21 | 55.52 | 3                         |
| DRA0234  | E                           | Uncharacterized protein                                                             | 0.17                 | 12.76                         | 5.27 | 41.29 | 1.5                       |
| DRA0249  | K                           | Metalloprotease, leishmanolysin-like                                                | 1.61                 | 6.47                          | 4.43 | 68.42 | 3                         |
| DRA0344  | ST                          | LexA repressor, HTH domain and protease                                             | 0.51                 | 1.80                          | 1.08 | 59.92 | 1.5                       |
| DRA0345  | ST                          | Predicted esterase, homologs of <i>E. coli</i> erythromycin esterase type II (EreB) | 0.68                 | 10.05                         | 4.39 | 43.72 | 1.5                       |
| DRA0346  | R                           | PprA protein, possibly involved in DNA damage resistance mechanisms                 | 0.65                 | 3.52                          | 1.94 | 55.14 | 0.5                       |
| DRB0067  | O                           | Extracellular nuclease containing fibronectin III domains                           | 0.29                 | 4.37                          | 1.21 | 27.58 | 3                         |
| DRB0069  | R                           | Subtilisin family serine protease                                                   | 0.92                 | 3.18                          | 1.39 | 43.62 | 3                         |
| DRB0070  | -                           | ABC-class ATPase                                                                    | 0.64                 | 4.00                          | 1.91 | 47.74 | 1.5                       |
| DRB0071  | H                           | Uncharacterized protein                                                             | 0.11                 | 2.60                          | 0.53 | 20.51 | 3                         |
| DRB0072  | E                           | Salicylate 1-monooxygenase                                                          | 0.37                 | 4.91                          | 2.31 | 47.04 | 1.5                       |
| DRB0133  | E                           | D-alanine permease                                                                  | 0.46                 | 3.51                          | 1.39 | 39.61 | 1.5                       |
| DRB0145  | -                           | Uncharacterized protein                                                             | 0.67                 | 4.77                          | 1.80 | 37.63 | 1.5                       |

\*Expression profile information in two last columns is shown only for one gene in an operon. All genes selected here are significantly induced (determined by statistical analyses).

†Designations of functional groups (from the COG database): see the legend for Fig. 8.
