# Supplementary material
Source: PubMed Central journal article supplement (PMC153069)
Supplement: pnas_0630387100_15.pdf [file pnas_0630387100_15.pdf]

**Table 4. Irradiation-response patterns of genes involved in replication, repair, and recombination functions in DEIRA**

| Gene name*    | Gene ID | Protein description and comments                                        | Pathway <sup>†</sup> | Relative basal level <sup>‡</sup> | Response to radiation, folds <sup>§</sup> | Time of response, h | STD  | CV, % |
|---------------|---------|-------------------------------------------------------------------------|----------------------|-----------------------------------|-------------------------------------------|---------------------|------|-------|
| Ogt/Yb<br>az  | DR0248  | O-6-methylguanine DNA methyltransferase                                 | DR                   | 0.71                              | 0.50                                      | 3                   | 0.32 | 63.99 |
| MutT          | DR0261  | 8-oxo-dGTPase                                                           | DR                   | 0.33                              | 3.85                                      | 12                  | 1.68 | 43.58 |
| AlkA          | DR2074  | 3-methyladenine DNA glycosylase II                                      | DR, BER              | 0.48                              | 0.70                                      | 0.5-9               |      |       |
|               | DR2584  |                                                                         |                      | 0.51                              | 0.93                                      | 0.5-9               |      |       |
| MutY          | DR2285  | 8-oxoguanine DNA glycosylase and AP-lyase, A-G mismatch DNA glycosylase | BER, MMY             | 0.19                              | 2.36                                      | 3                   | 0.40 | 16.83 |
| Nth-2         | DR2438  | Endonuclease III and thymine glycol DNA glycosylase                     | BER                  | 1.11                              | 0.36                                      | 3                   | 0.12 | 32.19 |
| Nth-1         | DR0289  |                                                                         |                      | 0.49                              | 1.09                                      | 0.5-9               |      |       |
|               | DR0928  |                                                                         |                      | 0.47                              | 0.89                                      | 0.5-9               |      |       |
| YhhF          | DR0643  | N6-adenine-specific methylase                                           | BER                  | 0.70                              | 0.39                                      | 3                   | 0.05 | 11.70 |
| MutM/<br>Fpg  | DR0493  | Formamidopyrimidine and 8-oxoguanine DNA glycosylase                    | BER                  | 0.68                              | 0.46                                      | 1.5                 | 0.09 | 18.71 |
| Nfi<br>(Yjaf) | DR2162  | Endonuclease V                                                          | BER                  | 0.31                              | 1.36                                      | 0.5-9               |      |       |
| PolA          | DR1707  | DNA polymerase I                                                        | BER                  | 5.81                              | 0.86                                      | 0.5-9               |      |       |
| Ung           | DR0689  | Uracil DNA glycosylase                                                  | BER                  | 0.68                              | 2.03                                      | 12                  | 1.41 | 69.35 |
|               | DR1663  |                                                                         |                      | 2.71                              | 2.52                                      | 24                  | 0.76 | 30.20 |

| Gene name*    | Gene ID | Protein description and comments                                   | Pathway <sup>†</sup> | Relative basal level <sup>‡</sup> | Response to radiation, folds <sup>§</sup> | Time of response, h | STD  | CV, % |
|---------------|---------|--------------------------------------------------------------------|----------------------|-----------------------------------|-------------------------------------------|---------------------|------|-------|
| Mug           | DR0715  | G/T mismatch-specific thymine DNA glycosylase                      | BER                  | 0.85                              | 0.17                                      | 3                   | 0.01 | 7.80  |
|               | DR1751  | Uracil DNA glycosylase                                             | BER                  | 0.86                              | 0.64                                      | 0.5-9               |      |       |
|               | DR0022  |                                                                    |                      | 0.47                              | 3.33                                      | 1.5                 | 0.87 | 26.18 |
| XthA          | DR0354  | Exodeoxyribonuclease III                                           | BER                  | 0.64                              | 0.95                                      | 0.5-9               |      |       |
| RadA          | DR1105  | Predicted ATP-dependent protease                                   | NER, BER             | 0.40                              | 1.08                                      | 0.5-9               |      |       |
| Mfd           | DR1532  | Transcription-repair coupling factor; helicase                     | NER                  | 1.25                              | 0.69                                      | 0.5-9               |      |       |
| UvrA-1        | DR1771  | ATPase, excinuclease                                               | NER                  | 1.44                              | 3.52                                      | 1.5                 | 1.15 | 32.56 |
| UvrA-2        | DRA0188 | subunit                                                            |                      | 0.13                              | 2.03                                      | 5                   | 0.90 | 44.42 |
| UvrB          | DR2275  | Helicase, excinuclease subunit                                     | NER                  | 0.80                              | 4.93                                      | 3                   | 1.81 | 36.76 |
| UvrC          | DR1354  | Nuclease, excinuclease subunit                                     | NER                  | 1.02                              | 3.78                                      | 3                   | 0.42 | 11.04 |
| UvrD          | DR1775  | Helicase II, excinuclease subunit; initiates unwinding from a nick | NER, mMM, SOS        | 1.19                              | 3.30                                      | 1.5                 | 1.69 | 51.25 |
| MutL          | DR1669  | ATPase                                                             | mMM, VSP             | 0.42                              | 0.99                                      | 0.5-9               |      |       |
| MutS          | DR1976  | ATPase                                                             | mMM, VSP             | 0.35                              | 1.31                                      | 0.5-9               |      |       |
| XseA/<br>Nec7 | DR0186  | Exonuclease VII, large subunit                                     | MM                   | 1.07                              | 2.19                                      | 1.5                 | 0.83 | 37.89 |
| SbcC          | DR1922  | ATPase, SbcCD exonuclease subunit                                  | RER                  | 1.36                              | 1.39                                      | 0.5-9               |      |       |
| SbcD          | DR1921  | Exonuclease, SbcCD subunit                                         | RER                  | 0.55                              | 1.82                                      | 3                   | 0.27 | 15.06 |

| Gene name* | Gene ID          | Protein description and comments                                                                                                                           | Pathway <sup>†</sup> | Relative basal level <sup>‡</sup> | Response to radiation, folds <sup>§</sup> | Time of response, h | STD  | CV, % |
|------------|------------------|------------------------------------------------------------------------------------------------------------------------------------------------------------|----------------------|-----------------------------------|-------------------------------------------|---------------------|------|-------|
| RecA       | DR2340           | Recombinase; ssDNA-dependent ATPase; activator of LexA autoproteolysis                                                                                     | RER, SOS             | 1.46                              | 7.98                                      | 1.5                 | 3.86 | 48.40 |
| RecD       | DR1902           | DNA-dependent ATPase or helicase; in other bacteria, regulatory subunit of the RecBCD recombinase (helicase-nuclease); RecB and RecC are missing in DEIRA. | RER                  | 1.16                              | 0.80                                      | 0.5-9               |      |       |
| RecF       | DR1089           | ATPase; required for daughter-strand gap repair                                                                                                            | RER                  | 0.10                              | 0.59                                      | 1.5                 | 0.32 | 54.76 |
| RecG       | DR1916           | Holliday junction-specific DNA helicase; branch migration inducer                                                                                          | RER                  | 1.03                              | 2.66                                      | 0.5                 | 0.87 | 32.62 |
| RecJ       | DR1126           | Nuclease                                                                                                                                                   | RER                  | 1.94                              | 0.33                                      | 12                  | 0.12 | 37.43 |
| RecN       | DR1477           | ATPase                                                                                                                                                     | RER                  | 1.28                              | 0.93                                      | 0.5-9               |      |       |
| RecO       | DR0819           | Biochemical activity unknown; required for daughter-strand gap repair                                                                                      | RER                  | 1.34                              | 1.10                                      | 0.5-9               |      |       |
| RecQ       | DR2444<br>DR1289 | Helicase; suppressor of illegitimate recombination                                                                                                         | RER                  | 1.85<br>0.34                      | 2.43<br>1.19                              | 0.5<br>0.5-9        | 0.27 | 11.18 |
| RecR       | DR0198           | Inactivated Toprim-domain protein; required for daughter-strand gap                                                                                        | RER                  | 1.71                              | 0.90                                      | 0.5-9               |      |       |

| Gene name* | Gene ID            | Protein description and comments                                                                                                                                                        | Pathway <sup>†</sup> | Relative basal level <sup>‡</sup> | Response to radiation, folds <sup>§</sup> | Time of response, h | STD  | CV, % |
|------------|--------------------|-----------------------------------------------------------------------------------------------------------------------------------------------------------------------------------------|----------------------|-----------------------------------|-------------------------------------------|---------------------|------|-------|
|            |                    | repair                                                                                                                                                                                  |                      |                                   |                                           |                     |      |       |
| RuvA       | DR1274             | Holliday-junction-binding subunit of the RuvABC resolvosome                                                                                                                             | RER                  | 0.89                              | 0.95                                      | 0.5-9               |      |       |
| RuvB       | DR0596             | Helicase subunit of the RuvABC resolvosome                                                                                                                                              | RER                  | 2.58                              | 3.22                                      | 0.5                 | 1.31 | 40.82 |
| RuvB       | DR0440             | Endonuclease subunit of the RuvABC resolvosome                                                                                                                                          | RER                  | 3.99                              | 0.20                                      | 24                  | 0.09 | 45.47 |
| DnaC       | DR0507             | Polymerase subunit of the DNA polymerase III holoenzyme                                                                                                                                 | MP                   | 0.81                              | 0.43                                      | 12                  | 0.15 | 35.32 |
| DnaQ       | DR0856             | 3'-5' exonuclease subunit of the DNA polymerase III holoenzyme                                                                                                                          | MP                   | 0.31                              | 1.97                                      | 0.5                 | 1.04 | 52.62 |
| DnlJ       | DR2069             | NAD-dependnet DNA ligase                                                                                                                                                                | MP                   | 1.58                              | 0.17                                      | 3                   | 0.05 | 28.26 |
| Ssb        | DR0099             | Single-strand binding protein; D. radiodurans R1 has three incomplete ORFs corresponding to different fragments of Ssb; it remains unclear whether D. radiodurans has a functional Ssb. | MP                   | 3.92                              | 3.01                                      | 0.5                 | 1.20 | 39.80 |
| LexA       | DRA0344<br>DRA0074 | Transcriptional regulator, repressor of the SOS regulon, autoprotease                                                                                                                   | SOS                  | 0.51<br>4.74                      | 1.80<br>0.80                              | 1.5<br>0.5-9        | 1.08 | 59.92 |
| YcjD       | DR0221             | Predicted very short patch                                                                                                                                                              | VSP?                 | 0.37                              | 1.94                                      | 3                   | 0.81 | 41.73 |

| Gene name*           | Gene ID | Protein description and comments                                                                                                | Pathway <sup>†</sup> | Relative basal level <sup>‡</sup> | Response to radiation, folds <sup>§</sup> | Time of response, h | STD  | CV, % |
|----------------------|---------|---------------------------------------------------------------------------------------------------------------------------------|----------------------|-----------------------------------|-------------------------------------------|---------------------|------|-------|
|                      | DR2566  | repair nuclease                                                                                                                 |                      | 0.42                              | 4.10                                      | 3                   | 1.09 | 26.48 |
| HAM1/<br>YggV        | DR0179  | Xantosine triphosphate pyrophosphatase, prevents 6-N-hydroxylaminopurin mutagenesis                                             | DR                   | 0.35                              | 1.00                                      | 0.5-9               |      |       |
| Uve1/B<br>S_Ywj<br>d | DR1819  | UV-endonuclease                                                                                                                 | NER                  | 0.29                              | 1.06                                      | 0.5-9               |      |       |
| Yejh/R<br>ad25       | DRA0131 | Helicase of superfamily II, predicted nuclease; DRA0131 has an additional McrA nuclease domain                                  | NER                  | 0.07                              | 0.51                                      | 3                   | 0.32 | 62.57 |
|                      | DR0690  | Topoisomerase IB, probably of eukaryotic origin                                                                                 | ?                    | 0.41                              | 1.10                                      | 0.5-9               |      |       |
|                      | DR1721  | 3'→5' nuclease                                                                                                                  | ?                    | 0.54                              | 1.36                                      | 0.5-9               |      |       |
| Rsr                  | DR1262  | RNA-binding protein Ro; ribonucleoproteins complexed with several small RNA molecules. Involved in UV-resistance in Deinococcus | ?                    | 0.68                              | 1.04                                      | 0.5-9               |      |       |
| Mrr                  | DR1877  |                                                                                                                                 | ?                    | 0.44                              | 0.79                                      | 0.5-9               |      |       |
| Mrr-1                | DR0508  | Nuclease                                                                                                                        |                      | 0.59                              | 0.78                                      | 0.5-9               |      |       |
| Mrr-2                | DR0587  |                                                                                                                                 |                      | 0.78                              | 0.95                                      | 0.5-9               |      |       |
| XerC                 | DRA0155 |                                                                                                                                 | RER                  | 0.26                              | 0.95                                      | 0.5-9               |      |       |

| Gene name* | Gene ID | Protein description and comments                                             | Pathway <sup>†</sup> | Relative basal level <sup>‡</sup> | Response to radiation, folds <sup>§</sup> | Time of response, h | STD  | CV, % |
|------------|---------|------------------------------------------------------------------------------|----------------------|-----------------------------------|-------------------------------------------|---------------------|------|-------|
| XerD       | DRB0104 | Integrase/recombinase                                                        |                      | 0.94                              | 0.53                                      | 3                   | 0.11 | 20.56 |
| XerC/D     | DRC0018 |                                                                              |                      | 0.10                              | 2.72                                      | 12                  | 0.77 | 28.19 |
| GyrA       | DR1913  | DNA gyrase, subunitA                                                         | general              | 4.12                              | 3.29                                      | 0.5                 | 1.56 | 47.51 |
| GyrB       | DR0906  | DNA gyrase, subunitB                                                         | general              | 2.75                              | 4.41                                      | 0.5                 | 2.98 | 67.46 |
| DnaE       | DR0601  | DNA primase                                                                  | general              | 1.36                              | 0.59                                      | 3                   | 0.04 | 7.40  |
| TopA       | DR1374  | DNA topoisomerase                                                            | general              | 2.58                              | 0.45                                      | 9                   | 0.10 | 23.03 |
| DnaN       | DR0001  | DNA polymerase III, beta subunit                                             | general              | 2.28                              | 2.71                                      | 0.5                 | 0.45 | 16.69 |
|            | DR2332  | DNA polymerase III gamma and tau subunit, inactivated AAA superfamily ATPase | general              | 0.05                              | 2.73                                      | 12                  | 1.74 | 63.70 |
|            | DR2410  | DNA polymerase III, gamma and tau subunit, AAA superfamily ATPase            | general              | 4.15                              | 0.29                                      | 9                   | 0.14 | 47.65 |

Red, up-regulated; blue, down-regulated; pink, no changes.

\*The gene names are from *E. coli*, whenever an *E. coli* ortholog exists, or from *B. subtilis* (with the prefix BS\_).

<sup>†</sup>Abbreviations of DNA repair pathways: DR, direct damage reversal; BER, base excision repair; NER, nucleotide excision repair; mMM, methylation-dependent mismatch repair; MMY, MutY, dependent mismatch repair; VSP, very short patch mismatch repair; RER, recombinational repair; SOS, SOS repair; MP, multiple pathways. Potential new repair pathways are indicated by a question mark; general, genes that are also involved in replication; ?, unknown.

<sup>‡</sup>The ratio of the fluorescent intensity of a particular gene to the average intensity of all arrayed genes when nonirradiated sample is used as a labeled probe.

<sup>§</sup>The maximum, minimum, or average ratio of the irradiated sample(s) harvested at the “Time of response” to the nonirradiated control. There is no SD and coefficient of variation (CV) for an average ratio of several time points.
