# Supplementary material
Source: PubMed Central journal article supplement (PMC153069)

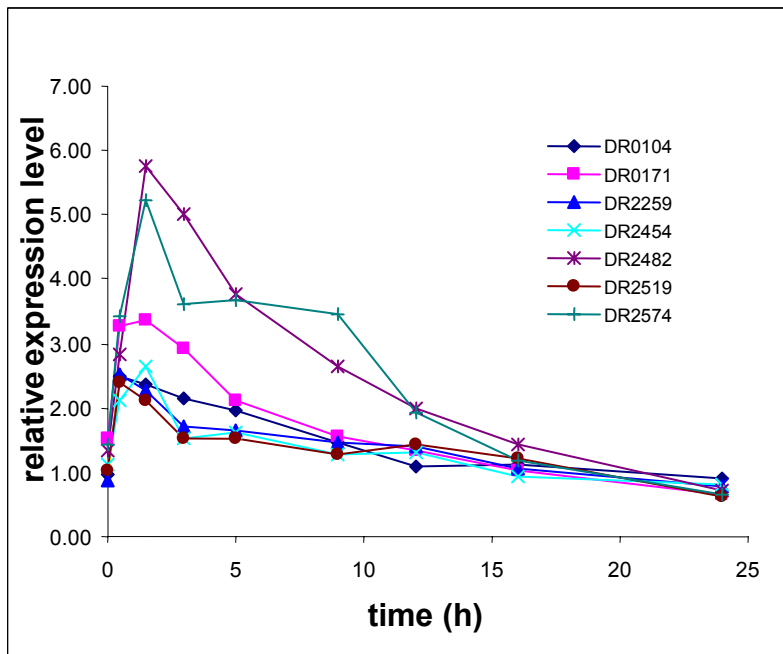

Supplement: pnas_0630387100_11.pdf [file pnas_0630387100_11.pdf]

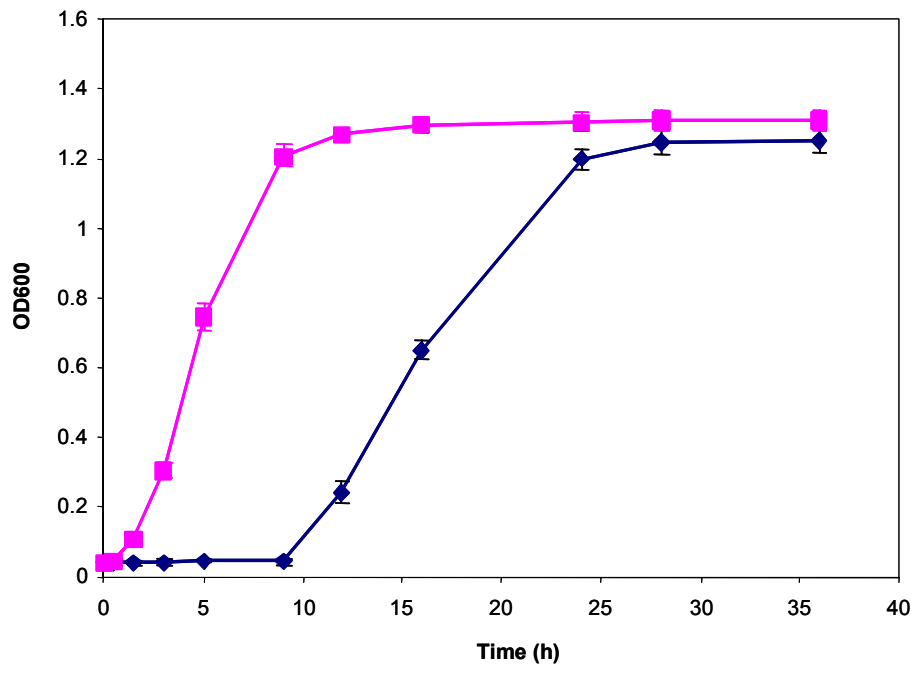

Supplement: pnas_0630387100_3.pdf [file pnas_0630387100_3.pdf]

**A**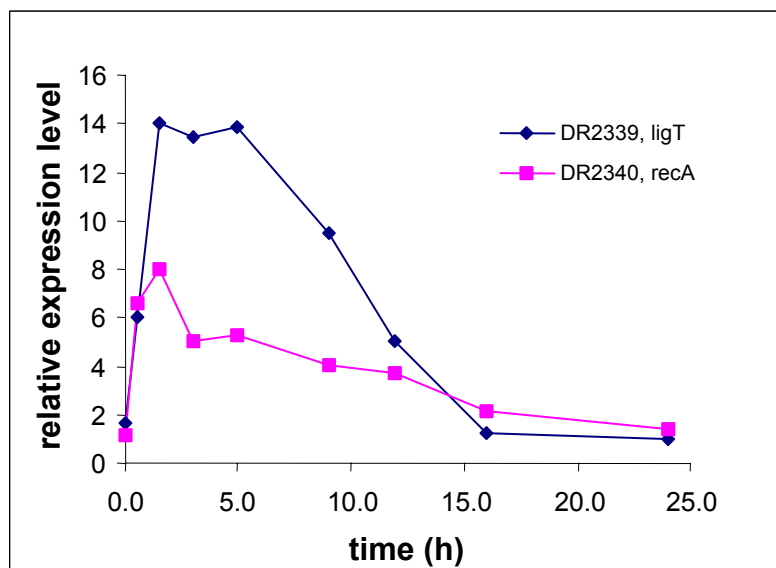**B**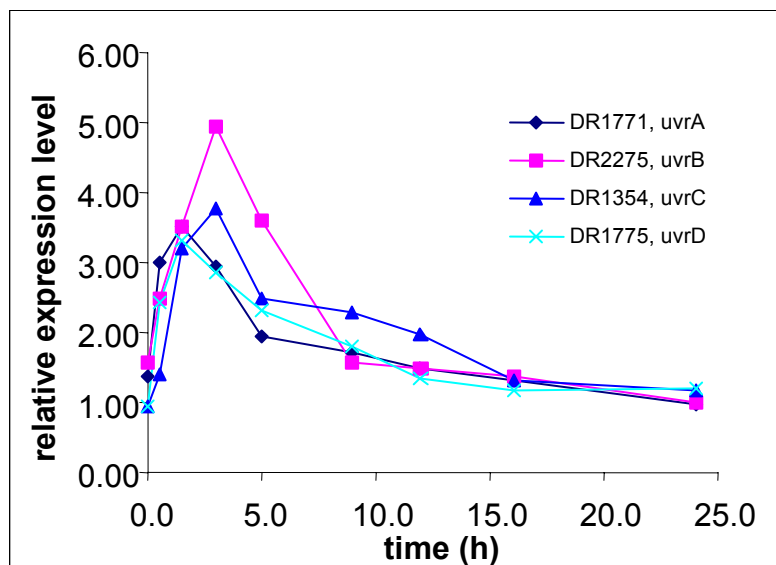

Supplement: pnas_0630387100_5.pdf [file pnas_0630387100_5.pdf]

**A**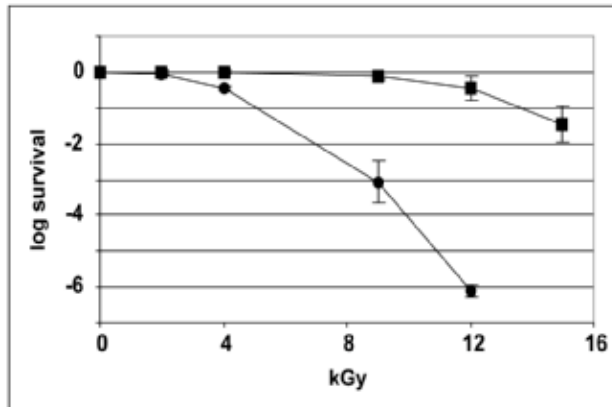**B**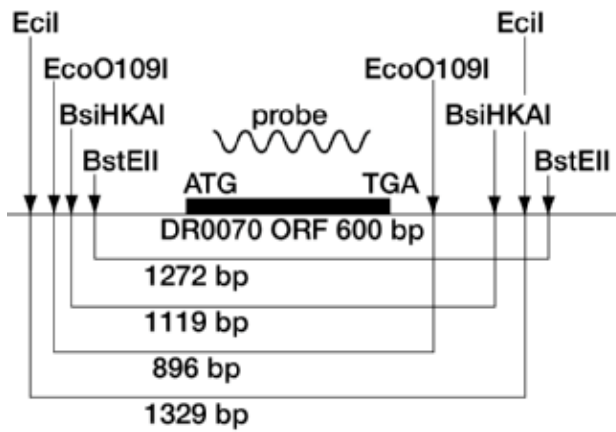**C**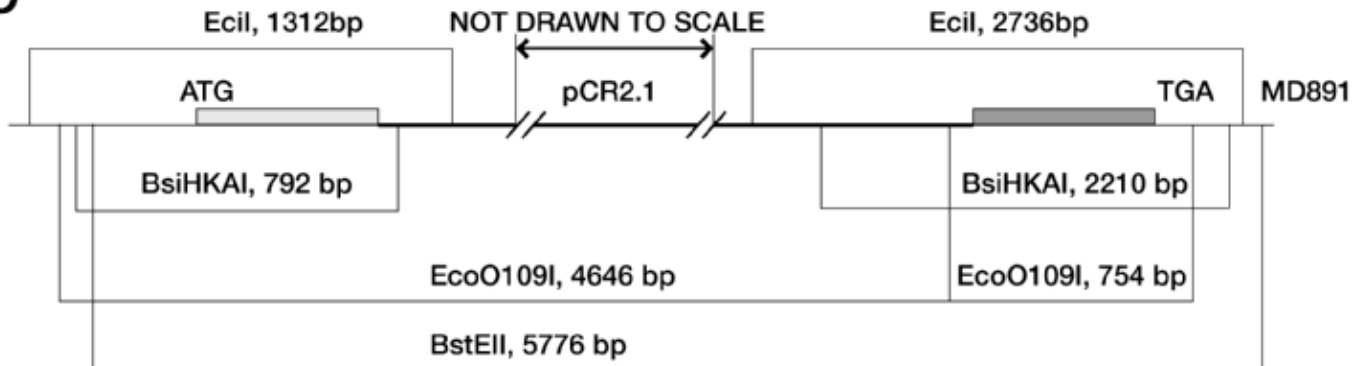**D**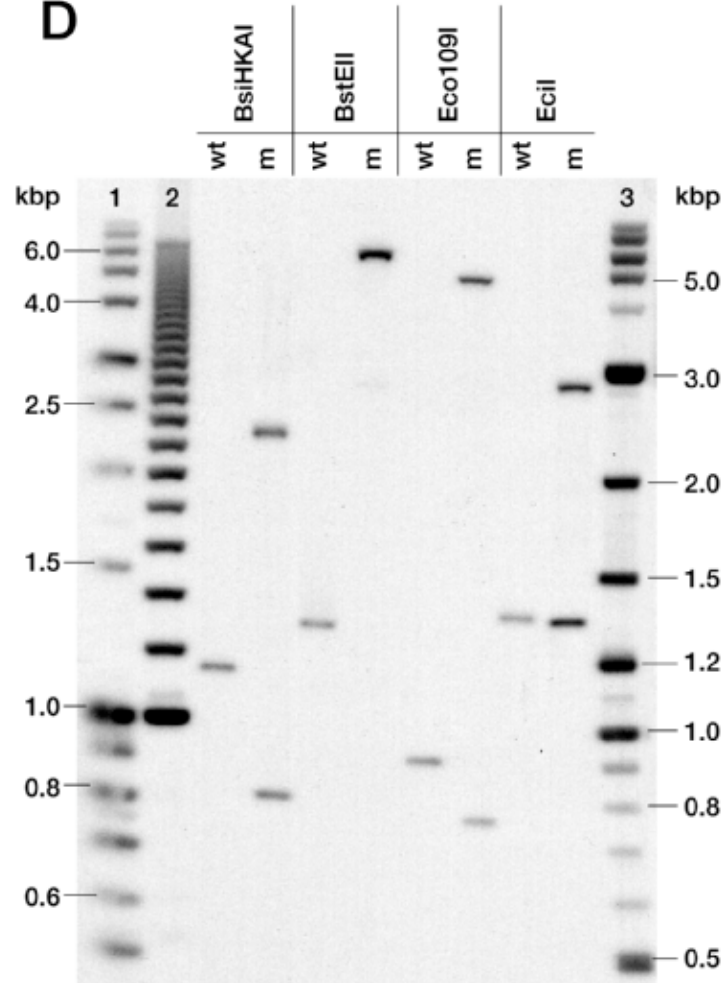

Supplement: pnas_0630387100_7.pdf [file pnas_0630387100_7.pdf]

A

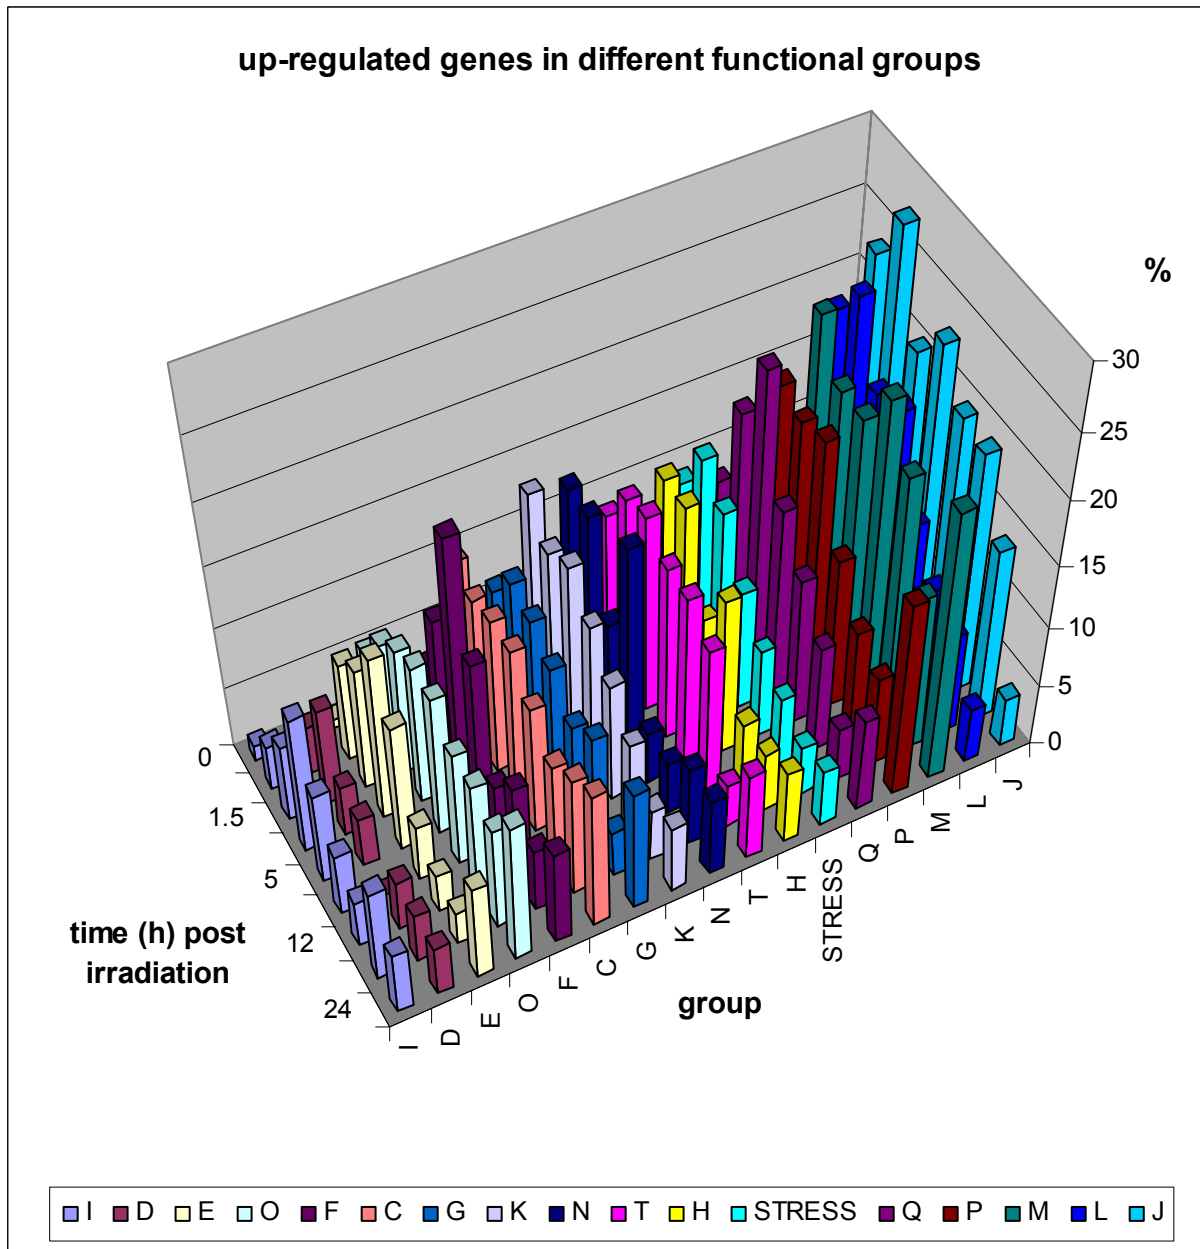

B

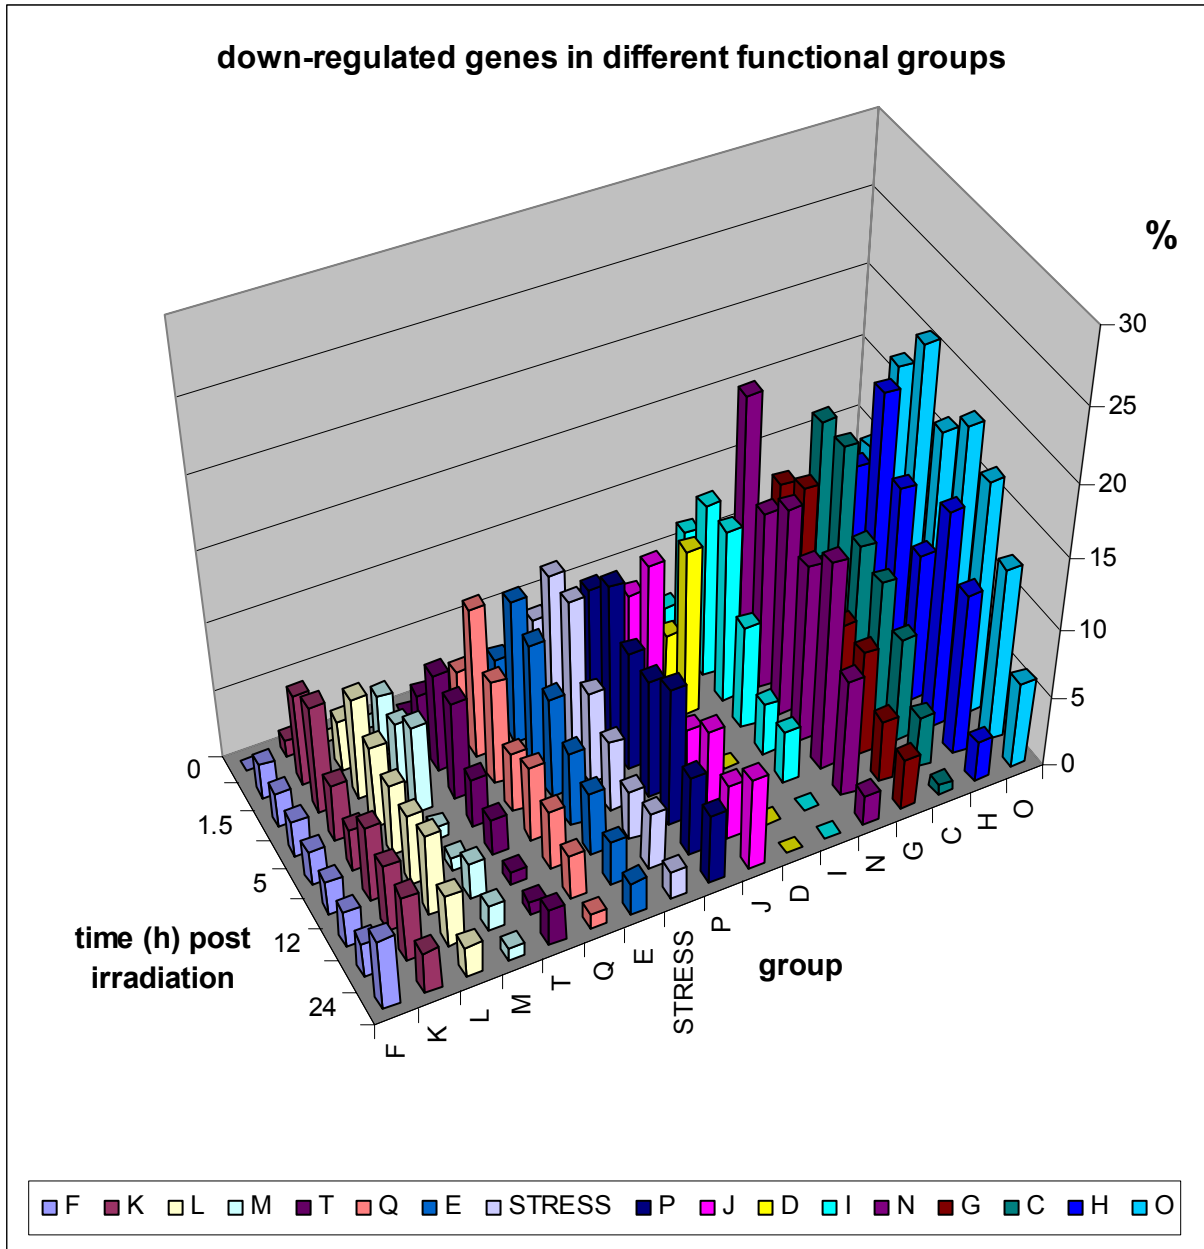

Supplement: pnas_0630387100_9.pdf [file pnas_0630387100_9.pdf]
